# Supplementary material for: Tumoricidal and Bactericidal Properties of ZnONPs Synthesized Using Cassia auriculata Leaf Extract
Source: MDPI journal article supplement (doi:10.3390/biom10070982), 2020-06-30
Supplement: s1 [file s1]

# Supplementary information

## Tumoricidal and Bactericidal Properties of ZnONPs Synthesized Using *Cassia auriculata* Leaf Extract

Kollur Shiva Prasad<sup>1\*</sup>, Shashanka K Prasad<sup>2</sup>, Mohammad Azam Ansari<sup>3\*</sup>, Mohammad A Alzohairy<sup>4</sup>, Mohammad N Alomary<sup>5</sup>, Sami AlYahya<sup>6</sup>, Chandrashekar Srinivasa<sup>7</sup>, Murali Mahadevamurthy<sup>8</sup>, Veena Malligere Ankegowda<sup>9</sup>, Chandan Shivamallu<sup>2\*</sup>

<sup>1</sup>Department of Sciences, Amrita School of Arts and Sciences, Amrita Vishwa Vidyapeetham, Mysuru Campus, Mysuru, Karnataka – 570 026, India.

<sup>2</sup>Department of Biotechnology and Bioinformatics, School of Life Sciences, JSS Academy of Higher Education and Research, Mysuru, Karnataka – 570 015, India.

<sup>3</sup>Department of Epidemic Disease Research, Institutes for Research and Medical Consultations (IRMC), Imam Abdulrahman Bin Faisal University, Dammam 31441, Saudi Arabia.

<sup>4</sup>Department of Medical Laboratories, College of Applied Medical Sciences, Qassim University, Qassim 51431, Saudi Arabia.

<sup>5</sup>National Center for Biotechnology, Life Science and Environmental Research Institute, King Abdulaziz City for Science and Technology, P.O. Box 6086, Riyadh, Saudi Arabia.

<sup>6</sup>National Center for Biotechnology, King Abdulaziz City for Science and Technology, Riyadh, P.O. Box 6086, Saudi Arabia.

<sup>7</sup>Department of Studies in Biotechnology, Davangere University, Shivagangotri, Karnataka – 577 002, India.

<sup>8</sup>Department of Studies in Botany, University of Mysore, Manasagangotri, Mysore 570006, Karnataka, India.

<sup>9</sup>Department of Chemistry, Bangalore Institute of Technology, K.R. Road, V V Puram, Karnataka, Bangalore 560 004, India; veenamdy12@gmail.com

\*Correspondence: shivachemist@gmail.com (K.S.P.); maansari@iau.edu.sa (M.A.A.); chandans@jssuni.edu.in (C.S.)

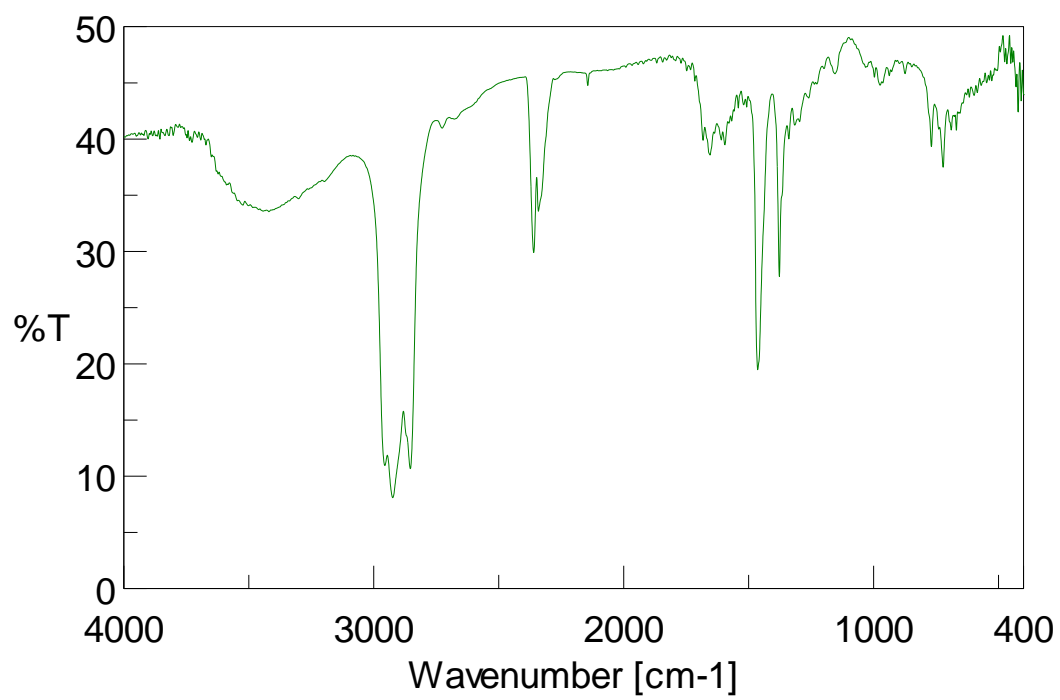

**Figure S1:** FT-IR spectrum of as-obtained ZnONPs using CEA.

**Comparative Growth Curve - *K. pneumonia***

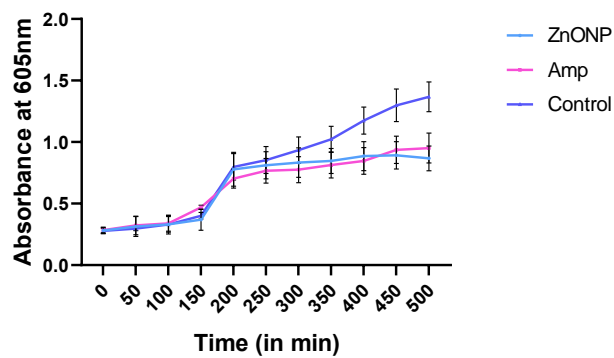

**Comparative Growth Curve - *R. solanacearum***

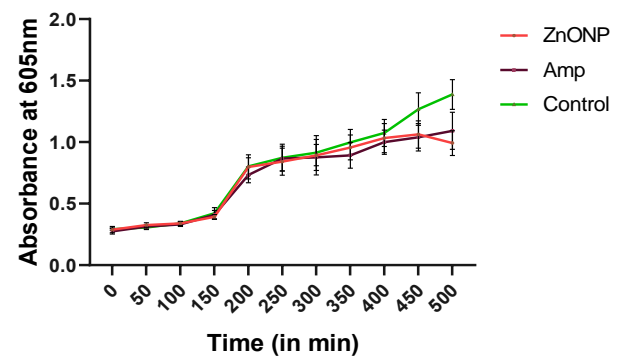

**Comparative Growth Curve - *X. vesicatoria***

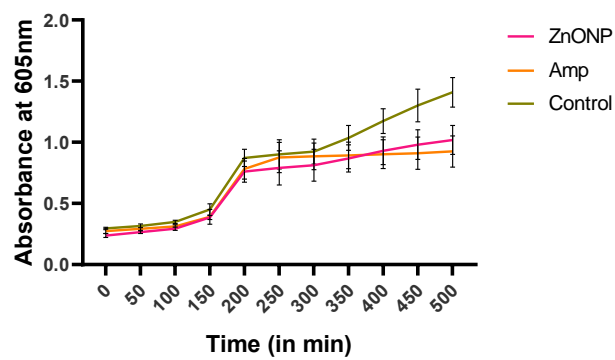

**Comparative Growth Curve - *E. coli***

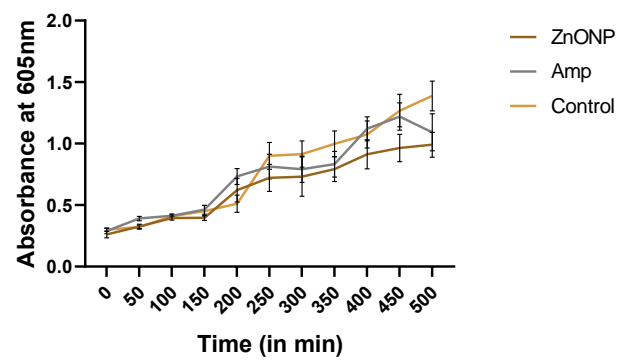

**Figure S2:** Comparative display of growth curves of test bacteria in absence and presence of synthesized ZnONPs. Experiments were performed in triplicate.
